# Supplementary material for: Evolutionary Novelty in a Butterfly Wing Pattern through Enhancer Shuffling
Source: PLoS Biol. 2016 Jan 15;14(1):e1002353. doi: 10.1371/journal.pbio.1002353 (PMC4714872; doi:10.1371/journal.pbio.1002353)
Supplement: S1 Table — (XLSX) [file pbio.1002353.s004.xlsx]

## Sheet: Sheet1
Plot, phenotype and	Samples with	Samples without
sample group	phenotype	phenotype
Plot A. ray (black line)	H. t contigua (8520)	H.t timareta (9184)
H. timareta only	H.t. contigua (9223)	H.t. timareta (8533),
		H.t. timareta (9178)
Plot A. ray (grey line)	H.m. malleti (17162)	H.m. plesseni (16293)
H. melpomene only	H.m. ecuadorensis (9177)	H.m. plesseni (9156)
	H.m.thelxiopeia (13566)	H.m. meriana (13819.)
Plot A,C. ray (orange line)	H. t contigua (8520)	H.t. timareta (9184)
H. timareta plus H. melpomene	H.t. contigua (9233)	H.t. timareta (8533),
	H.m. malleti (17162)	H.t. timareta (9178)
	H.m. ecuadorensis (9177)	H.m. plesseni (16293)
	H.m.thelxiopeia (13566)	H.m. plesseni (9156)
		H.m. meriana (13819.)
Plot B. dennis (black line)	H.t. rio pato (2409)	H.t. florencia (2403)
H. timareta only	H.t. contigua (8520)	H.t. florencia (2406)
	H.t. thelxinoe (09-313)	H.t. florencia (2407)
		H.t. florencia (2410)
Plot B. dennis (grey line)	H.m. cythera (2856)	H.m. malleti (17162)
H. melpomene only	H.m. plesseni (9156)	H.m. ecuadorensis (9117)
	H.m. amaryllis (09-79)	H.m. aglaope (09-357)
	H.m. melpomene (9317)	H.m. meriana (13819)
	H.m. melpomene (m0.06)	H.m. thelxiopeia (13566)
Plot B,C. dennis (red line)	H.t. rio pato (2409)	H.t. florencia (2403)
H. timareta plus H. melpomene	H.t. contigua (8520)	H.m. malleti (17162)
	H.t. thelxinoe (09-313)	H.m. ecuadorensis (9117)
	H.m. cythera (2856)	H.m. aglaope (09-357)
	H.m. plesseni (9156)	H.m. meriana (13819)
	H.m. amaryllis (09-79)	H.m. thelxiopeia (13566)
	H.m. melpomene (9317)
	H.m. melpomene (m0.06)
