# Supplementary material for: Evolutionary Novelty in a Butterfly Wing Pattern through Enhancer Shuffling
Source: PLoS Biol. 2016 Jan 15;14(1):e1002353. doi: 10.1371/journal.pbio.1002353 (PMC4714872; doi:10.1371/journal.pbio.1002353)
Supplement: S2 Table — Identical nucleotide similarity comparison was conducted between alleles for the dennis and ray regions as shown in Table 1, but with ray-morph individuals grouped together for the dennis region analysis (top) and dennis-morph individuals grouped for the ray region analysis (bottom). (XLSX) [file pbio.1002353.s005.xlsx]

## Sheet: Sheet1
DENNIS - R	Outgroup	Silvaniforms	Ray	Postman
Outgroup	14.5	17.6	17.4	16.9
Silvaniforms		3.8	4.2	5.3
Ray			2.5	4.8
Postman				1.6
RAY - D	Outgroup	Silvaniforms	Dennis	Postman
Outgroup	13.6	16.7	17.5	17.5
Silvaniforms		3.6	7.0	7.3
Dennis			1.9	2.7
Postman				1.2
