# Supplementary material for: Evolutionary Novelty in a Butterfly Wing Pattern through Enhancer Shuffling
Source: PLoS Biol. 2016 Jan 15;14(1):e1002353. doi: 10.1371/journal.pbio.1002353 (PMC4714872; doi:10.1371/journal.pbio.1002353)
Supplement: S3 Table — (XLSX) [file pbio.1002353.s006.xlsx]

## Sheet: SuppTableX
			Phenotypic information (1 present, 0 absent)								Sequencing method			Sequence alignment statistics, using filtering (MQ=>30, GQ>=30, minimum depth=4 to 300 reads per site
Genus	Species	Race	rays	dennis	band	Sample Code	vcf file name	Location	Lat.	Long.	Whole Genome Shotgun (WGS), SureSelect (SS)	Centre	Platform	Total sites evaluated (of 602276 bp)	Called sites	Missing sites	% missing data from 602276 bp scaffold	Total SNPs	Homozygous SNPs (alternate allele to reference)	Heterozygous SNPs	Previously published	Study accession	Sample accession	Assembly accession	Experiment accession	Run accession
Heliconius	aoede		0	0	0	JM-09-347		Michaela Bastida, Peru	5° 58' 18'' S	76° 13' 55'' W	WGS	FAS Harvard	HiSeq									ERP009041	ERS977656	ERZ225215	ERX1222366	ERR1143556
Heliconius	cydno	alithea	0	0	0	CAM009999	cydno.1	Insectary reared	-	-	WGS			593932	468304	125628	0.222443	11600	11257	317		ERP009041	ERS977657	ERZ225216	ERX1222367	ERR1143557
Heliconius	cydno	alithea (white)	0	0	0	CAM008509	34-8509.H.c.alithea-w	Ecuador, Pichincha	0° 38' 52" S	78° 47' 22" W	WGS	GenePool	HiSeq	593932	293967	299965	0.511907	9912	6425	3411		ERP009041	ERS977658	ERZ225217	ERX1222368	ERR1143558
Heliconius	cydno	alithea (yellow)	0	0	0	CAM008517	35-8517.H.c.alithea-y	Ecuador, Pichincha	0° 38' 52" S	78° 47' 22" W	WGS	GenePool	HiSeq	593932	439482	154450	0.270298	14204	8566	5536		ERP009041	ERS977659	ERZ225218	ERX1222369	ERR1143559
Heliconius	cydno	chioneus	0	0	0	CAM000553	chioneus.553	Panama	9° 10' 17" N	79° 45' 26" W	WGS	GenePool	GAII	593932	506320	87612	0.159322	15804	8641	7037	Martin et al Genome Res	ERP002440	ERS235659	ERZ225219	ERX234883	ERR260295
Heliconius	cydno	chioneus	0	0	0	CAM000560	chioneus.560	Panama	9° 10' 17" N	79° 45' 26" W	WGS	GenePool	GAII	593932	505627	88305	0.160473	15723	8540	7077	Martin et al Genome Res	ERP002440	ERS235660	ERZ225220	ERX234884	ERR260296
Heliconius	cydno	chioneus	0	0	0	CAM000564	chioneus.564	Panama	9° 10' 17" N	79° 45' 26" W	WGS	GenePool	GAII	593932	503590	90342	0.163855	15932	8496	7312	Martin et al Genome Res	ERP002440	ERS235661	ERZ225221	ERX234885	ERR260297
Heliconius	cydno	chioneus	0	0	0	CAM000565	chioneus.565	Panama	9° 10' 17" N	79° 45' 26" W	WGS	GenePool	GAII	593932	508117	85815	0.156339	15876	8769	6971	Martin et al Genome Res	ERP002440	ERS235662	ERZ225222	ERX234886	ERR260298
Heliconius	cydno	cordula	0	0	0	STRI_007	c007	San Cristobal, Venezuela	7° 47' 56'' N	72° 11' 56'' W	WGS	Baylor	HiSeq (1/2)	593932	510553	83379	0.152294	16213	8644	7569		ERP009041	ERS977660	ERZ225223	ERX1222370	ERR1143560
Heliconius	cydno	cordula	0	0	0	M2258	H.c.cordula2	San Cristobal, Venezuela	7° 47' 56'' N	72° 11' 56'' W	SS	GenePool	HiSeq	593932	486926	107006	0.191523	15399	8696	6703	Nadeau et al Phil Trans	ERP000971	ERS070229	ERZ225224	ERX030865	ERR053817
Heliconius	cydno	cordula	0	0	0	M2255	H.c.cordula3	San Cristobal, Venezuela	7° 47' 56'' N	72° 11' 56'' W	SS	GenePool	HiSeq	593932	486904	107028	0.19156	15020	9087	5933	Nadeau et al Phil Trans	ERP000971	ERS070230	ERZ225225	ERX030866	ERR053818
Heliconius	cydno	cordula	0	0	0	M2253	H.c.cordula4	San Cristobal, Venezuela	7° 47' 56'' N	72° 11' 56'' W	SS	GenePool	HiSeq	593932	487206	106726	0.191059	15459	8853	6606	Nadeau et al Phil Trans	ERP000971	ERS070231	ERZ225226	ERX030867	ERR053819
Heliconius	cydno	cordula	0	0	0	M2157	H.c.cordula6	San Cristobal, Venezuela	7° 47' 56'' N	72° 11' 56'' W	SS	GenePool	HiSeq	593932	487232	106700	0.191015	15449	8856	6593	Nadeau et al Phil Trans	ERP000971	ERS070232	ERZ225227	ERX030868	ERR053820
Heliconius	cydno	cydnides	0	0	0	CS002017	26-2017.H.c.cydnides	Marsella-Risaralda, Colombia	4° 52' 39'' N	75° 42' 37'' W	WGS	GenePool	HiSeq	593932	495540	98392	0.177221	14662	8632	5928		ERP009041	ERS977661	ERZ225228	ERX1222371	ERR1143561
Heliconius	cydno	cydnides	0	0	0	CS002018	27-2018.H.c.cydnides	Marsella-Risaralda, Colombia	4° 52' 39'' N	75° 42' 37'' W	WGS	GenePool	HiSeq	593932	276701	317231	0.540574	9592	6378	3147		ERP009041	ERS977662	ERZ225229	ERX1222372	ERR1143562
Heliconius	cydno	hermogenes	0	0	0	CS003278	33-3278.H.c.hermogenes	Santafé de los guaduales, Colombia	1° 24' 33'' N	75° 11' 82'' W	WGS	GenePool	HiSeq	593932	212670	381262	0.646889	7504	5418	2029		ERP009041	ERS977663	ERZ225230	ERX1222373	ERR1143563
Heliconius	cydno	weymeri f. gustavi	0	0	0	CS002529	29-2529.H.cydno.gustavi	Helechaux, Colombia	2° 30' 29'' N	76° 35' 12'' W	WGS	GenePool	HiSeq	593932	478578	115354	0.205384	14237	9077	5072		ERP009041	ERS977664	ERZ225231	ERX1222374	ERR1143564
Heliconius	cydno	weymeri f. weymeri	0	0	0	CS001690	28-1690.H.cydno.weymeri	Helechaux, Colombia	2° 30' 29'' N	76° 35' 12'' W	WGS	GenePool	HiSeq	593932	378839	215093	0.370988	12271	7930	4234		ERP009041	ERS977665	ERZ225232	ERX1222375	ERR1143565
Heliconius	cydno	zelinde	0	0	0	CS002262	32-2262.H.c.zelinde	Ladrilleros, Colombia	3° 56' 22'' N	77° 22' 08'' W	WGS	GenePool	HiSeq	593932	493414	100518	0.180751	15320	8813	6406		ERP009041	ERS977666	ERZ225233	ERX1222376	ERR1143566
Heliconius	doris		0	0	0	JM-02-1939		Km-5 Shapaja-Chazuta, Peru	6° 35' 56" S	76° 13' 10" W	WGS	FAS Harvard	HiSeq									ERP009041	ERS977667	ERZ225234	ERX1222377	ERR1143567
Heliconius	doris	doris (blue)	0	0	0	CAM008684		San Martin, Peru	6° 17' 22" S	76° 13' 44" W	WGS	GenePool	HiSeq									ERP009041	ERS977668	ERZ225235	ERX1222378	ERR1143568
Heliconius	doris	delila (red)	0	0	0	CAM008697		San Martin, Peru	6° 14' 21" S	76° 16' 7" W	WGS	GenePool	HiSeq									ERP009041	ERS977669	ERZ225236	ERX1222379	ERR1143569
Heliconius	elevatus	bari	1	1	0	MJ09-4037	H.elevatus.bar_MJ09-4037	Patawa Laie, French Guiana	4°32'42" N	52° 8'20" W	WGS	FAS Harvard	HiSeq	593932	493798	100134	0.180113	18464	11970	6354		ERP009041	ERS977670	ERZ225237	ERX1222380	ERR1143570
Heliconius	elevatus	bari	1	1	0	MJ09-4056	H.elevatus.bar_MJ09-4056	Patawa Laie, French Guiana	4°32'42" N	52° 8'20" W	WGS	FAS Harvard	HiSeq	593932	485925	108007	0.193186	21209	14011	7023		ERP009041	ERS977671	ERZ225238	ERX1222381	ERR1143571
Heliconius	elevatus	bari	1	1	0	MJ09-4094	H.elevatus.bar_MJ09-4094	Patawa Laie, French Guiana	4°32'42" N	52° 8'20" W	WGS	FAS Harvard	HiSeq	593932	491359	102573	0.184163	18094	11883	6066		ERP009041	ERS977672	ERZ225239	ERX1222382	ERR1143572
Heliconius	elevatus		1	1	0	JM-09-343	Elevatus.09-343	Km-103.1 Tarapoto-Yurimaguas, Peru	5° 58' 18'' S	76° 13' 55'' W	SS	GenePool	HiSeq	593932	474882	119050	0.211521	18486	11265	7221	Heliconius Genome Consortium	ERP000991	ERS070295	ERZ225240	ERX030984	ERR053936
Heliconius	elevatus		1	1	0	JM-09-118	H.elevatus_3_ACAGTG_L003	Munichis, Peru	5° 54' 37'' S	6° 13' 33'' W	WGS	FAS Harvard	HiSeq	593932	494499	99433	0.17895	18701	11811	6739	Heliconius Genome Consortium	ERP000991	ERS070236	ERZ225241	ERX030872	ERR053824
Heliconius	elevatus		1	1	0	JM-09-163	H.elevatus_3_GCCAAT_L003	Km-75 Tarapoto-Yurimaguas, Peru	6° 10' 37'' S	76° 15' 24'' W	WGS	FAS Harvard	HiSeq	593932	496880	97052	0.174996	19258	11717	7398		ERP009041	ERS977673	ERZ225242	ERX1222383	ERR1143573
Heliconius	elevatus		1	1	0	JM-09-270	H.elevatus_5_CTTGTA_L006	Michaela Bastida, Peru	5° 58' 18'' S	76° 13' 55'' W	WGS	FAS Harvard	HiSeq	593932	486801	107131	0.191731	19184	11130	7896		ERP009041	ERS977674	ERZ225243	ERX1222384	ERR1143574
Heliconius	elevatus		1	1	0	JM-09-302	H.elevatus_6_TGACCA_L007	Km-17.2 Tarapoto-Yurimaguas, Peru	6° 27' 43'' S	76° 17' 31'' W	WGS	FAS Harvard	HiSeq	593932	497932	96000	0.173249	19448	11287	8015	Heliconius Genome Consortium	ERP000991	ERS070238	ERZ225244	ERX030876	ERR053828
Heliconius	elevatus		1	1	0	BC_0408		Pimpiala, Ecuador	1° 04' 33" S	77° 56' 14" W	WGS	Baylor	HiSeq (1/2)									ERP009041	ERS977675	ERZ225245	ERX1222385	ERR1143575
Heliconius	ethilla	aerotome	0	0	0	JM-09-63		Km-8 Tarapoto-Yurimaguas, Peru	6° 27' 49'' S	76° 20' 07'' W	SS	GenePool	HiSeq								Heliconius Genome Consortium	ERP000991	ERS070296	ERZ225246	ERX030985	ERR053937
Heliconius	ethilla		0	0	0	JM-09-49		Km-17.2 Tarapoto-Yurimaguas, Peru	6° 27' 42'' S	76° 17' 30'' W	WGS	FAS Harvard	HiSeq									ERP009041	ERS977676	ERZ225247	ERX1222386	ERR1143576
Heliconius	ethilla	aerotome	0	0	0	JM-09-67		Urahuasha, Peru	6° 28' 0" S	76° 20' 5" W	WGS	FAS Harvard	HiSeq								Martin et al Genome Research	ERP002440	ERS235669	ERZ225248	ERX234893	ERR260305
Heliconius	ethilla		0	0	0	JM-09-62		Urahuasha, Peru	6° 28' 0" S	76° 20' 5" W	WGS	FAS Harvard	HiSeq									ERP009041	ERS977677	ERZ225249	ERX1222387	ERR1143577
Heliconius	ethilla		0	0	0	JM-09-66		Urahuasha, Peru	6° 28' 0" S	76° 20' 5" W	WGS	FAS Harvard	HiSeq									ERP009041	ERS977678	ERZ225250	ERX1222388	ERR1143578
Heliconius	hecale		0	0	0	JM-02-1326		Km-7.2 Pongo-Barranquita, Peru	6° 17' 12'' S	76° 13' 54'' W	WGS	FAS Harvard	HiSeq									ERP009041	ERS977679	ERZ225251	ERX1222389	ERR1143579
Heliconius	hecale		0	0	0	JM-09-272		Michaela Bastida, Peru	5° 58' 18'' S	76° 13' 55'' W	WGS	FAS Harvard	HiSeq									ERP009041	ERS977680	ERZ225252	ERX1222390	ERR1143580
Heliconius	hecale		0	0	0	JM-09-164		Km-75 Tarapoto-Yurimaguas, Peru	6° 10' 37'' S	76° 15' 24'' W	WGS	FAS Harvard	HiSeq									ERP009041	ERS977681	ERZ225253	ERX1222391	ERR1143581
Heliconius	hecale		0	0	0	STRI_001		Gamboa, Panama	9° 7' 9" N	79° 41' 51" W	WGS	Baylor	HiSeq (1/2)									ERP009041	ERS977682	ERZ225254	ERX1222392	ERR1143582
Heliconius	hecale	felix	0	0	0	JM-09-345		Km-103.1 Tarapoto-Yurimaguas, Peru	5° 58' 18'' S	76° 13' 55'' W	SS	GenePool	HiSeq								Heliconius Genome Consortium	ERP000991	ERS070297	ERZ225255	ERX030986	ERR053938
Heliconius	hecale	felix	0	0	0	JM-09-273		Peru	5° 58' 18" S	76° 13' 54" W	WGS	FAS Harvard	HiSeq								Martin et al Genome Research	ERP002440	ERS235670	ERZ225256	ERX234894	ERR260306
Heliconius	hecuba	flava	0	0	0	CAM008550		Sucumbios, near La Bonita, Ecuador	00° 28' 30" N	77° 33' 18" W	WGS	GenePool	HiSeq									ERP009041	ERS977683	ERZ225257	ERX1222393	ERR1143583
Heliconius	heurippa		0	0	1	CH9-H.heurippa	CH9-H.heurippa	Buenavista, Colombia	4° 10' 30'' N	73° 40' 41'' W	WGS		HiSeq	593932	540471	53461	0.102619	14225	9471	4675	Heliconius Genome Consortium	ERP000991	ERS074400	ERZ225258	ERX032450	ERR055404
Heliconius	heurippa		0	0	1	STRI_002	h0.02	Buenavista, Colombia	4° 10' 30'' N	73° 40' 41'' W	WGS	Baylor	HiSeq (1/2)	593932	520958	72974	0.135018	13274	9667	3607		ERP009041	ERS977684	ERZ225259	ERX1222394	ERR1143584
Heliconius	hierax		0	0	0	CAM008149		Napo, Ecuador	0° 10' 55" S	77° 41' 4" W	WGS	GenePool	HiSeq									ERP009041	ERS977685	ERZ225260	ERX1222395	ERR1143585
Heliconius	ismenius		0	0	0	STRI_003		Gamboa, Panama	9° 7' 9" N	79° 41' 51" W	WGS	Baylor	HiSeq (1/2)									ERP009041	ERS977686	ERZ225261	ERX1222396	ERR1143586
Heliconius	ismenius	metaphorus	0	0	0	CAM009995		Western Ecuador, insectary reared	-	-	SS		HiSeq								Nadeau et al Phil Trans	ERP000971	ERS070235	ERZ225262	ERX030871	ERR053823
Heliconius	melpomene	aglaope	1	1	0	CAM009998	aglaope.1	Insectary reared	-	-	WGS		HiSeq	593932	478768	115164	0.205069	11619	10823	770		ERP009041	ERS977687	ERZ225263	ERX1222397	ERR1143587
Heliconius	melpomene	aglaope	1	1	0	JM-11-572	Hm.aglaope_12_CAGATC_11-572	Michaela Bastida, Peru	5° 56' 44" S	76° 14' 47" W	WGS	FAS Harvard	HiSeq	593932	516126	77806	0.143041	15091	8661	6340	Martin et al Genome Research	ERP002440	ERS235658	ERZ225264	ERX234882	ERR260294
Heliconius	melpomene	aglaope	1	1	0	JM-11-569	Hm.aglaope_12_GCCAAT_11-569	Michaela Bastida, Peru	5° 56' 44" S	76° 14' 43" W	WGS	FAS Harvard	HiSeq	593932	519076	74856	0.138143	15549	8415	7022	Martin et al Genome Research	ERP002440	ERS235657	ERZ225265	ERX234881	ERR260293
Heliconius	melpomene	aglaope	1	1	0	JM-09-246	Melpomene_aglaope.09-246	Km-103.1 Tarapoto-Yurimaguas, Peru	5° 58' 18'' S	76° 13' 55'' W	SS	GenePool	HiSeq	593932	480135	113797	0.202799	14500	8473	6027	Nadeau et al Phil Trans	ERP000971	ERS070211	ERZ225266	ERX030847	ERR053799
Heliconius	melpomene	aglaope	1	1	0	JM-09-267	Melpomene_aglaope.09-267	Km-103.1 Tarapoto-Yurimaguas, Peru	5° 58' 18'' S	76° 13' 55'' W	SS	GenePool	HiSeq	593932	484108	109824	0.196202	15244	8664	6580	Nadeau et al Phil Trans	ERP000971	ERS070212	ERZ225267	ERX030848	ERR053800
Heliconius	melpomene	aglaope	1	1	0	JM-09-268	Melpomene_aglaope.09-268	Idea Religiosa, Munichis, Peru	5° 54' 37'' S	76° 13' 33'' W	SS	GenePool	HiSeq	593932	483133	110799	0.197821	15115	8213	6902	Nadeau et al Phil Trans	ERP000971	ERS070213	ERZ225268	ERX030849	ERR053801
Heliconius	melpomene	aglaope	1	1	0	JM-09-357	Melpomene_aglaope.09-357	Km-103.1 Tarapoto-Yurimaguas, Peru	5° 58' 18'' S	76° 13' 55'' W	SS	GenePool	HiSeq	593932	481979	111953	0.199737	14577	8765	5812	Nadeau et al Phil Trans	ERP000971	ERS070214	ERZ225269	ERX030850	ERR053802
Heliconius	melpomene	aglaope	1	1	0	JM-09-112		Munichis, Peru	5° 54' 37" S	76° 13' 32" W	WGS	FAS Harvard	HiSeq								Martin et al Genome Research	ERP002440	ERS235656	ERZ225270	ERX234880	ERR260292
Heliconius	melpomene	aglaope	1	1	0	1048-143N20		Insectary reared, Fosmid	-	-	PCR,Sanger	Source BioScience										Genbank		KU200222
Heliconius	melpomene	aglaope	1	1	0	1048-3N15		Insectary reared, Fosmid	-	-	Shotgun	Wellcome Trust SI	HiSeq									Genbank		KU200223
Heliconius	melpomene	amandus	0	0	1	CS002221	22-2221.Hm.amandus	Angostura, Bolivia	18° 9' 30'' S	63° 30' 31'' W	WGS	GenePool	HiSeq	593932	509173	84759	0.154585	14173	7613	6468		ERP009041	ERS977688	ERZ225271	ERX1222398	ERR1143588
Heliconius	melpomene	amandus	0	0	1	CS002228	23-2228.Hm.amandus	Angostura, Bolivia	18° 9' 30'' S	63° 30' 31'' W	WGS	GenePool	HiSeq	593932	508782	85150	0.155234	14340	7254	6999		ERP009041	ERS977689	ERZ225272	ERX1222399	ERR1143589
Heliconius	melpomene	amaryllis	0	0	1	CAM009997	amaryllis.1	Insectary reared	-	-	WGS		HiSeq	593932	498840	95092	0.171742	13487	7951	5458		ERP009041	ERS977690	ERZ225273	ERX1222400	ERR1143590
Heliconius	melpomene	amaryllis	0	0	1	JM-09-216	Hm.amaryllis_10_CTTGTA_09-216	Puente Serranoyacu, Peru	5° 40' 32'' S	77° 40' 29'' W	WGS	FAS Harvard	HiSeq	593932	520332	73600	0.136057	14063	8982	5000	Martin et al Genome Research	ERP002440	ERS235653	ERZ225274	ERX234877	ERR260289
Heliconius	melpomene	amaryllis	0	0	1	JM-11-160	Hm.amaryllis_13_ACAGTG_11-160	Rio Shilcayo, Peru	6° 28' 6" S	76° 21' 11" W	WGS	FAS Harvard	HiSeq	593932	525113	68819	0.128119	14578	9110	5373	Martin et al Genome Research	ERP002440	ERS235652	ERZ225275	ERX234876	ERR260288
Heliconius	melpomene	amaryllis	0	0	1	JM-11-293	Hm.amaryllis_13_TGACCA_11-293	Urahuasha, Peru	6° 28' 13" S	76° 20' 50" W	WGS	FAS Harvard	HiSeq	593932	530764	63168	0.118736	14811	8548	6154	Martin et al Genome Research	ERP002440	ERS235654	ERZ225276	ERX234878	ERR260290
Heliconius	melpomene	amaryllis	0	0	1	JM-09-332	Melpomene_amaryllis.09-332	Tarapoto - Urahuasha trail, Peru	6° 28' 40'' S	76° 21' 06'' W	SS	GenePool	HiSeq	593932	501442	92490	0.167422	14104	8337	5767	Nadeau et al Phil Trans	ERP000971	ERS070217	ERZ225277	ERX030853	ERR053805
Heliconius	melpomene	amaryllis	0	0	1	JM-09-333	Melpomene_amaryllis.09-333	Tarapoto - Urahuasha trail, Peru	6° 28' 40'' S	76° 21' 06'' W	SS	GenePool	HiSeq	593932	501320	92612	0.167624	13825	8773	5052	Nadeau et al Phil Trans	ERP000971	ERS070218	ERZ225278	ERX030854	ERR053806
Heliconius	melpomene	amaryllis	0	0	1	JM-09-75	Melpomene_amaryllis.09-75	Km-8 Tarapoto-Yurimaguas, Peru	6° 27' 49'' S	76° 20' 07'' W	SS	GenePool	HiSeq	593932	499371	94561	0.17086	13846	8937	4909	Nadeau et al Phil Trans	ERP000971	ERS070215	ERZ225279	ERX030851	ERR053803
Heliconius	melpomene	amaryllis	0	0	1	JM-09-79	Melpomene_amaryllis.09-79	Km-8 Tarapoto-Yurimaguas, Peru	6° 27' 49'' S	76° 20' 07'' W	SS	GenePool	HiSeq	593932	500582	93350	0.168849	14099	8871	5228	Nadeau et al Phil Trans	ERP000971	ERS070216	ERZ225280	ERX030852	ERR053804
Heliconius	melpomene	cythera	0	0	1	CAM002856	20-2856.Hm.cythera	Ecuador	0° 19' 10" S	79° 20' 13" W	WGS	GenePool	HiSeq	593932	519852	74080	0.136854	10264	2572	7631		ERP009041	ERS977691	ERZ225281	ERX1222401	ERR1143591
Heliconius	melpomene	cythera	0	0	1	CAM002857		Pichincha Ecuador	0° 19' 11" S	79° 20' 13" W	WGS	GenePool	1149502	827796	304726	523070	26.5094	5380	1474	3906		ERP009041	ERS977692	ERZ225282	ERX1222402	ERR1143592
Heliconius	melpomene	bellula	0	0	1	CS000228	24-228.Hm.mocoa	Putumayo, Colombia	1° 10' 41'' N	76° 39' 53'' W	WGS	GenePool	HiSeq	593932	497836	96096	0.173409	13022	8509	4441		ERP009041	ERS977693	ERZ225283	ERX1222403	ERR1143593
Heliconius	melpomene	bellula	0	0	1	CS000231	25-231.Hm.mocoa	Putumayo, Colombia	1° 10' 41'' N	76° 39' 53'' W	WGS	GenePool	HiSeq	593932	306234	287698	0.491539	8916	6061	2814		ERP009041	ERS977694	ERZ225284	ERX1222404	ERR1143594
Heliconius	melpomene	ecuadorensis	1	1	0	CAM009117	14-9117.Hm.ecuadorensis	Zamora, Ecuador	4° 2' 38" S	78° 59' 10" W	WGS	GenePool	HiSeq	593932	473228	120704	0.214267	14292	8143	6052		ERP009041	ERS977695	ERZ225285	ERX1222405	ERR1143595
Heliconius	melpomene	ecuadorensis	1	1	0	CAM009121	15-9121.Hm.ecuadorensis	Zamora, Ecuador	4° 2' 38" S	78° 59' 10" W	WGS	GenePool	HiSeq	593932	383843	210089	0.362679	12286	6439	5776		ERP009041	ERS977696	ERZ225286	ERX1222406	ERR1143596
Heliconius	melpomene	malleti x plesseni	0	1	0	CAM016042		Ecuador (Col Mariscal I)	1° 22' 16" S	77° 52' 28" W	WGS	GenePool	HiSeq									ERP009041	ERS977697	ERZ225287	ERX1222407	ERR1143597
Heliconius	melpomene	malleti	1	1	0	CAM016550	Hm.malleti.16550	Y de Misahuallí, Ecuador	1° 2' 12" S	77° 24' 3" W	WGS	GenePool	HiSeq	593932	316131	277801	0.475106	9610	6090	3456		ERP009041	ERS977698	ERZ225288	ERX1222408	ERR1143598
Heliconius	melpomene	malleti	1	1	0	CAM017162	malleti.17162	Y de Misahuallí, Ecuador	1° 2' 12" S	77° 24' 3" W	WGS			593932	460426	133506	0.235523	14676	8480	6122		ERP009041	ERS977699	ERZ225289	ERX1222409	ERR1143599
Heliconius	melpomene	melpomene	0	0	1	STRI_WOM_0041		Darién, Panama	9° 9' 9" N	78° 41' 24" W	WGS	Baylor	HiSeq (1/3)									ERP009041	ERS977700	ERZ225290	ERX1222410	ERR1143600
Heliconius	melpomene	melpomene	0	0	1	STRI_WOM_0043		Darién, Panama	9° 9' 9" N	78° 41' 24" W	WGS	Baylor	HiSeq (1/3)									ERP009041	ERS977701	ERZ225291	ERX1222411	ERR1143601
Heliconius	melpomene	melpomene	0	0	1	CAM018097	16-18097.Hm.melpomene	Darién, Panama	8° 16' 46" N	77° 48' 35" W	WGS	GenePool	HiSeq	593932	499489	94443	0.170664	8766	2798	5922	Martin et al Genome Research	ERP002440	ERS235650	ERZ225292	ERX234874	ERR260286
Heliconius	melpomene	melpomene	0	0	1	CAM018038	17-18038.Hm.melpomene	Darién, Panama	8° 36' 48" N	78° 8' 23" W	WGS	GenePool	HiSeq	593932	553224	40708	0.0814444	9511	2998	6477	Martin et al Genome Research	ERP002440	ERS235649	ERZ225293	ERX234873	ERR260285
Heliconius	melpomene	melpomene	0	0	1	STRI_006	m0.06	Colombia	5° 37' 1'' N	72° 18' 0'' W	WGS	Baylor	HiSeq (1/2)	593932	553408	40524	0.0811389	10606	3639	6967		ERP009041	ERS977702	ERZ225294	ERX1222412	ERR1143602
Heliconius	melpomene	melpomene	0	0	1	CAM013435	melpomeneFG.13435	French Guiana	4° 54' 54" N	52° 25' 12" W	WGS	GenePool	GAII	593932	521960	71972	0.133354	13179	7566	5538	Martin et al Genome Research	ERP002440	ERS235648	ERZ225295	ERX234872	ERR260284
Heliconius	melpomene	melpomene	0	0	1	CAM009315	melpomeneFG.9315	French Guiana	4° 57' 47" N	52° 25' 12" W	WGS	GenePool	GAII	593932	510137	83795	0.152985	12549	7255	5231	Martin et al Genome Research	ERP002440	ERS235645	ERZ225296	ERX234869	ERR260281
Heliconius	melpomene	melpomene	0	0	1	CAM009316	melpomeneFG.9316	French Guiana	4° 57' 47" N	52° 25' 12" W	WGS	GenePool	GAII	593932	501742	92190	0.166923	12349	7233	5050	Martin et al Genome Research	ERP002440	ERS235646	ERZ225297	ERX234870	ERR260282
Heliconius	melpomene	melpomene	0	0	1	CAM009317	melpomeneFG.9317	French Guiana	4° 57' 47" N	52° 25' 12" W	WGS	GenePool	GAII	593932	519476	74456	0.137478	12889	7443	5378	Martin et al Genome Research	ERP002440	ERS235647	ERZ225298	ERX234871	ERR260283
Heliconius	melpomene	melpomene	0	0	1	gen_ref	melpomenePAN.1	Darién, Panama	8° 36' 48" N	78° 8' 23" W	WGS			593932	579646	14286	0.0375741	241	3	238	Heliconius Genome Consortium	SRP011154	SRR424576	GCA_000313835.2	SRX124669	SRR424576
Heliconius	melpomene	mixed	0	0	1	AEHM-19L14		Insectary reared, BAC library	-	-	Sanger	Wellcome Trust SI										Genbank		CU672261
Heliconius	melpomene	meriana	0	1	0	CAM013819	12-13819.Hm.meriana	Neueve Wakapo, French Guiana	3° 40' 8" N	54° 3' 53" W	WGS	GenePool	HiSeq	593932	411964	181968	0.315988	10841	6569	4199		ERP009041	ERS977703	ERZ225299	ERX1222413	ERR1143603
Heliconius	melpomene	meriana	0	1	0	CAM013715	Hm.meriana.13715	Neueve Wakapo, French Guiana	3° 40' 8" N	54° 3' 53" W	WGS	GenePool	HiSeq	593932	201645	392287	0.665195	5595	3505	2050		ERP009041	ERS977704	ERZ225300	ERX1222414	ERR1143604
Heliconius	melpomene	plesseni	0	0	1	CAM009156	Hm.plesseni.9156	Tungurahua, Ecuador	1° 23' 53" S	78° 10' 41" W	WGS	GenePool	HiSeq	593932	491890	102042	0.183281	12966	8398	4493		ERP009041	ERS977705	ERZ225301	ERX1222415	ERR1143605
Heliconius	melpomene	plesseni	0	0	1	CAM016293	plesseni.16293	Pindo-Mirador, Ecuador	1° 16' 33" S	78° 2' 37" W	WGS			593932	457310	136622	0.240697	13106	7968	5065		ERP009041	ERS977706	ERZ225302	ERX1222416	ERR1143606
Heliconius	melpomene	rosina	0	0	1	CAM009996	rosina.1	Insectary reared	-	-	WGS			593932	541162	52770	0.101472	8392	2657	5699		ERP009041	ERS977707	ERZ225303	ERX1222417	ERR1143607
Heliconius	melpomene	rosina	0	0	1	CAM002071	rosina.2071	Gamboa, Panama	9° 7' 9" N	79° 41' 51" W	WGS	GenePool	GAII	593932	547065	46867	0.0916706	9517	3326	6154	Heliconius Genome Consortium	ERP000991	ERS074426	ERZ225304	ERX032476	ERR055430
Heliconius	melpomene	rosina	0	0	1	CAM000531	rosina.531	Gamboa, Panama	9° 7' 9" N	79° 41' 51" W	WGS	GenePool	GAII	593932	521000	72932	0.134948	8662	4026	4603	Martin et al Genome Research	ERP002440	ERS235641	ERZ225305	ERX234865	ERR260277
Heliconius	melpomene	rosina	0	0	1	CAM000533	rosina.533	Gamboa, Panama	9° 7' 9" N	79° 41' 51" W	WGS	GenePool	GAII	593932	515344	78588	0.144339	8611	3070	5508	Martin et al Genome Research	ERP002440	ERS235642	ERZ225306	ERX234866	ERR260278
Heliconius	melpomene	rosina	0	0	1	CAM000546	rosina.546	Gamboa, Panama	9° 7' 9" N	79° 41' 51" W	WGS	GenePool	GAII	593932	519318	74614	0.137741	8534	2692	5810	Martin et al Genome Research	ERP002440	ERS235643	ERZ225307	ERX234867	ERR260279
Heliconius	melpomene	thelxiopeia	1	1	0	CAM013566	Hm.thelxiopeia.13566	Neueve Wakapo, French Guiana	3° 39' 20" N	54° 2' 21"	WGS	GenePool	HiSeq	593932	505511	88421	0.160666	12879	7934	4870		ERP009041	ERS977708	ERZ225308	ERX1222418	ERR1143608
Heliconius	melpomene	vulcanus	0	0	1	CAM014632	18-14632.Hm.vulcanus	Darién, Panama	8° 36' 48" N	78° 8' 23" W	WGS	GenePool	HiSeq	593932	438706	155226	0.271586	8159	3026	5104		ERP009041	ERS977709	ERZ225309	ERX1222419	ERR1143609
Heliconius	melpomene	vulcanus	0	0	1	CS000519	19-519.Hm.vulcanus	Rio Bravo-Calima, Colombia	3° 53' 60'' N	76° 37' 57'' W	WGS	GenePool	HiSeq	593932	503446	90486	0.164094	8434	2704	5688		ERP009041	ERS977710	ERZ225310	ERX1222420	ERR1143610
Heliconius	numata	bicoloratus	0	0	0	MJ05_123		Fundo Biodiversidad km19 Tarapoto-Yurimaguas	6°27'40"S	76°17'7"W	WGS	GenePool	HiSeq									ERP009041	ERS977711	ERZ225311	ERX1222421	ERR1143611
Heliconius	numata	bicoloratus	0	0	0	JM-05-1116		Puente Rio Serranoyacu Rioja	5°40'28"S	77°40'10"W	WGS	FAS Harvard	HiSeq									ERP009041	ERS977712	ERZ225312	ERX1222422	ERR1143612
Heliconius	numata	arcuella	0	0	0	JM-05-1277		Km-26 Tarapoto-Yurimaguas, Peru	5°58'29"S	76°13'51"W	SS	GenePool	HiSeq								Nadeau et al Phil Trans	ERP000971	ERS070233	ERZ225313	ERX030869	ERR053821
Heliconius	numata	silvana	0	0	0	JM-09-364		Km-18 Tarapoto-Yurimaguas, Peru	6° 27' 11'' S	76° 17' 18'' W	SS	GenePool	HiSeq								Nadeau et al Phil Trans	ERP000971	ERS070220	ERZ225314	ERX030856	ERR053808
Heliconius	numata	tarapotensis	0	0	0	JM-05-1358		Km-8 Tarapoto-Yurimaguas, Peru	6°27'50"S	76°19'51"W	SS	GenePool	HiSeq								Nadeau et al Phil Trans	ERP000971	ERS070234	ERZ225315	ERX030870	ERR053822
Heliconius	pachinus		0	0	0	CAM008020	30-8020.H.pachinus	Chiriqui Panama	8° 50' 19" N	82° 42' 53" W	WGS	GenePool	HiSeq	593932	465453	128479	0.227177	13976	9469	4408		ERP009041	ERS977713	ERZ225316	ERX1222423	ERR1143613
Heliconius	pachinus		0	0	0	CAM008035	31-8035.H.pachinus	Chiriqui Panama	8° 50' 19" N	82° 42' 53" W	WGS	GenePool	HiSeq	593932	489026	104906	0.188037	14578	9475	5005		ERP009041	ERS977714	ERZ225317	ERX1222424	ERR1143614
Heliconius	pardalinus	sergestus	0	0	0	JM-09-326		Tarapoto - Urahuasha trail, Peru	6° 28' 40" S	76° 21' 6" W	SS	GenePool	HiSeq								Heliconius Genome Consortium	ERP000991	ERS070298	ERZ225318	ERX030987	ERR053939
Heliconius	pardalinus	sergestus	0	0	0	JM-09-202		Tarapoto - Urahuasha trail, Peru	6° 28' 40" S	76° 21' 6" W	WGS	FAS Harvard	HiSeq								Martin et al Genome Research	ERP002440	ERS235668	ERZ225319	ERX234892	ERR260304
Heliconius	pardalinus	sergestus	0	0	0	JM-09-201		Tarapoto - Urahuasha trail, Peru	6° 28' 40" S	76° 21' 6" W	WGS	FAS Harvard	HiSeq									ERP009041	ERS977715	ERZ225320	ERX1222425	ERR1143615
Heliconius	pardalinus	sergestus	0	0	0	JM-09-209		Tarapoto - Urahuasha trail, Peru	6° 28' 40" S	76° 21' 6" W	WGS	FAS Harvard	HiSeq									ERP009041	ERS977716	ERZ225321	ERX1222426	ERR1143616
Heliconius	pardalinus	sergestus	0	0	0	JM-09-210		Tarapoto - Urahuasha trail, Peru	6° 28' 40" S	76° 21' 6" W	WGS	FAS Harvard	HiSeq									ERP009041	ERS977717	ERZ225322	ERX1222427	ERR1143617
Heliconius	pardalinus	ssp. nov.	0	0	0	JM-09-372		Caño Tushmo, Peru	8° 20' 32" S	74° 35' 32" W	WGS	FAS Harvard	HiSeq									ERP009041	ERS977718	ERZ225323	ERX1222428	ERR1143618
Heliconius	pardalinus	ssp. nov.	0	0	0	JM-09-373		Caño Tushmo, Peru	8° 20' 32" S	74° 35' 32" W	WGS	FAS Harvard	HiSeq									ERP009041	ERS977719	ERZ225324	ERX1222429	ERR1143619
Heliconius	pardalinus	ssp. nov.	0	0	0	JM-09-371		Caño Tushmo, Peru	8° 20' 32" S	74° 35' 32" W	WGS	FAS Harvard	HiSeq								Martin et al Genome Research	ERP002440	ERS235667	ERZ225325	ERX234891	ERR260303
Heliconius	pardalinus	ssp. nov.	0	0	0	JM-09-374		Caño Tushmo, Peru	8° 20' 32" S	74° 35' 32" W	WGS	FAS Harvard	HiSeq									ERP009041	ERS977720	ERZ225326	ERX1222430	ERR1143620
Heliconius	pardalinus	ssp. nov.	0	0	0	JM-09-387		Caño Tushmo, Peru	8° 20' 32" S	74° 35' 32" W	SS	GenePool	HiSeq								Heliconius Genome Consortium	ERP000991	ERS070299	ERZ225327	ERX030988	ERR053940
Heliconius	timareta	timareta f.contigua	1	0	0	CAM009223	HtimContigua.9223	Tungurahua, Ecuador	1° 23' 53" S	78° 10' 41" W	WGS	GenePool	HiSeq	593932	478259	115673	0.205914	13132	8605	4473		ERP009041	ERS977721	ERZ225328	ERX1222431	ERR1143621
Heliconius	timareta	timareta f.contigua	1	0	0	BC_0406	Timareta_Ecuador_rays.BC0406	Tungurahua, Ecuador	1° 23' 53" S	78° 10' 41" W	WGS	Baylor	HiSeq (1/2)	593932	513128	80804	0.148019	14312	8539	5678		ERP009041	ERS977722	ERZ225329	ERX1222432	ERR1143622
Heliconius	timareta	timareta f.contigua	1	0	0	CAM008520	Timareta_Ecuador_rays.8520	Tungurahua, Ecuador	1° 23' 53" S	78° 10' 41" W	SS	GenePool	HiSeq	593932	496577	97355	0.175499	13592	8883	4709	Nadeau et al Phil Trans	ERP000971	ERS070221	ERZ225330	ERX030857	ERR053809
Heliconius	timareta	timareta f.contigua	1	0	0	CAM008523		Tungurahua, Ecuador	1° 23' 53" S	78° 10' 41" W	SS	GenePool	HiSeq								Nadeau et al Phil Trans	ERP000971	ERS070222	ERZ225331	ERX030858	ERR053810
Heliconius	timareta	florencia	1	1	0	CS002403	Cydno_florencia.2403	Quebrada Doraditas, Colombia	1° 43' 04''N	75° 42' 35''W	SS	GenePool	HiSeq	593932	485469	108463	0.193943	13926	9242	4684	Heliconius Genome Consortium	ERP000991	ERS070291	ERZ225332	ERX030980	ERR053932
Heliconius	timareta	florencia	1	1	0	CS002406	Cydno_florencia.2406	Quebrada Doraditas, Colombia	1° 43' 04''N	75° 42' 35''W	SS	GenePool	HiSeq	593932	484704	109228	0.195213	14552	8795	5757	Heliconius Genome Consortium	ERP000991	ERS070292	ERZ225333	ERX030981	ERR053933
Heliconius	timareta	florencia	1	1	0	CS002407	Cydno_florencia.2407	Quebrada Doraditas, Colombia	1° 43' 04''N	75° 42' 35''W	SS	GenePool	HiSeq	593932	485909	108023	0.193212	14615	9059	5556	Heliconius Genome Consortium	ERP000991	ERS070293	ERZ225334	ERX030982	ERR053934
Heliconius	timareta	florencia	1	1	0	CS002410	Cydno_florencia.2410	Quebrada Doraditas, Colombia	1° 43' 04''N	75° 42' 35''W	SS	GenePool	HiSeq	593932	484843	109089	0.194982	14280	9130	5150	Heliconius Genome Consortium	ERP000991	ERS070294	ERZ225335	ERX030983	ERR053935
Heliconius	timareta	linaresi	0	0	0	CS002234	Cydno_rio.2234	Puerto Amor, Colombia	2° 31' 17" N	74° 44' 22" W	SS	GenePool	HiSeq	593932	490985	102947	0.184784	14234	8672	5562	Nadeau et al Phil Trans	ERP000971	ERS070225	ERZ225336	ERX030861	ERR053813
Heliconius	timareta	linaresi	0	0	0	CS002409	Cydno_rio.2409	Puerto Amor, Colombia	2° 31' 17" N	74° 44' 22" W	SS	GenePool	HiSeq	593932	489135	104797	0.187856	14560	8921	5639	Nadeau et al Phil Trans	ERP000971	ERS070226	ERZ225337	ERX030862	ERR053814
Heliconius	timareta	linaresi	0	0	0	CS002434	Cydno_rio.2434	Puerto Amor, Colombia	2° 31' 17" N	74° 44' 22" W	SS	GenePool	HiSeq	593932	488733	105199	0.188523	14500	9026	5474	Nadeau et al Phil Trans	ERP000971	ERS070227	ERZ225338	ERX030863	ERR053815
Heliconius	timareta	linaresi	0	0	0	CS002435	Cydno_rio.2435	Puerto Amor, Colombia	2° 31' 17" N	74° 44' 22" W	SS	GenePool	HiSeq	593932	488088	105844	0.189594	14448	9314	5134	Nadeau et al Phil Trans	ERP000971	ERS070228	ERZ225339	ERX030864	ERR053816
Heliconius	timareta	thelxinoe	0	0	1	JM-09-312	Timareta_Peru.09-312	Km-18 Tarapoto-Yurimaguas, Peru	6° 27' 11'' S	76° 17' 19'' W	SS	GenePool	HiSeq	593932	492292	101640	0.182614	13727	7720	6007	Nadeau et al Phil Trans	ERP000971	ERS070219	ERZ225340	ERX030855	ERR053807
Heliconius	timareta	thelxinoe	0	0	1	JM-09-57	Ht.thelxinoe_11_TGACCA_09-57	Tarapoto-Yurimaguas, Peru	6° 27' 18" S	76° 17' 53" W	WGS	FAS Harvard	HiSeq	593932	525945	67987	0.126738	14726	7971	6656	Martin et al Genome Research	ERP002440	ERS235663	ERZ225341	ERX234887	ERR260299
Heliconius	timareta	thelxinoe	0	0	1	JM-09-86	Ht.thelxinoe_2_TGACCA_09-86	Tarapoto-Yurimaguas, Peru	6° 27' 18" S	76° 17' 53" W	WGS	FAS Harvard	HiSeq	593932	526067	67865	0.126535	12475	10124	2317	Martin et al Genome Research	ERP002440	ERS235665	ERZ225342	ERX234889	ERR260301
Heliconius	timareta	thelxinoe	0	0	1	JM-09-313	Ht.thelxinoe_6_ACAGTG_09-313	Km-18 Tarapoto-Yurimaguas, Peru	6° 27' 11" S	76° 17' 18" W	WGS	FAS Harvard	HiSeq	593932	527171	66761	0.124702	14365	8200	6083	Martin et al Genome Research	ERP002440	ERS235666	ERZ225343	ERX234890	ERR260302
Heliconius	timareta	thelxinoe	0	0	1	CAM008624	Timareta_Peru.8624	Km-15 Tarapoto-Yurimaguas, Peru	6° 27' 24'' S	76° 17' 54'' W	SS	GenePool	HiSeq	593932	491040	102892	0.184693	13388	8240	5148	Heliconius Genome Consortium	ERP000991	ERS070288	ERZ225344	ERX030977	ERR053929
Heliconius	timareta	thelxinoe	0	0	1	CAM008628	Timareta_Peru.8628	Km-15 Tarapoto-Yurimaguas, Peru	6° 27' 24'' S	76° 17' 54'' W	SS	GenePool	HiSeq	593932	492178	101754	0.182803	13351	8907	4444	Heliconius Genome Consortium	ERP000991	ERS070289	ERZ225345	ERX030978	ERR053930
Heliconius	timareta	thelxinoe	0	0	1	CAM008631	Timareta_Peru.8631	Km-15 Tarapoto-Yurimaguas, Peru	6° 27' 24'' S	76° 17' 54'' W	SS	GenePool	HiSeq	593932	493760	100172	0.180177	14551	7865	6686	Heliconius Genome Consortium	ERP000991	ERS070290	ERZ225346	ERX030979	ERR053931
Heliconius	timareta	timareta	0	0	0	CAM009178	timareta.9178	El Topo, Ecuador	1° 24' 43" S	78° 11' 08" W	WGS	GenePool	HiSeq	593932	486854	107078	0.191643	13389	7970	5345		ERP009041	ERS977723	ERZ225347	ERX1222433	ERR1143623
Heliconius	timareta	timareta	0	0	0	BC_0407	Timareta_Ecuador_norays.BC0407	Tungurahua, Ecuador	1° 23' 53" S	78° 10' 41" W	WGS	Baylor	HiSeq (1/2)	593932	524830	69102	0.128589	14214	8814	5310		ERP009041	ERS977724	ERZ225348	ERX1222434	ERR1143624
Heliconius	timareta	timareta	0	0	0	CAM008533	Timareta_Ecuador_norays.8533	Tungurahua, Ecuador	1° 23' 53" S	78° 10' 41" W	SS	GenePool	HiSeq	593932	501772	92160	0.166874	13381	8795	4586	Nadeau et al Phil Trans	ERP000971	ERS070223	ERZ225349	ERX030859	ERR053811
Heliconius	timareta	timareta	0	0	0	CAM009184	Timareta_Ecuador_norays.9184	Tungurahua, Ecuador	1° 23' 53" S	78° 10' 41" W	SS	GenePool	HiSeq	593932	502251	91681	0.166078	13182	8547	4635	Nadeau et al Phil Trans	ERP000971	ERS070224	ERZ225350	ERX030860	ERR053812
Heliconius	wallacei		0	0	0	JM-04-200		Pucallpa, Peru	8° 17' 21 S	74° 33' 16 W	WGS	FAS Harvard	HiSeq									ERP009041	ERS977725	ERZ225351	ERX1222435	ERR1143625
Heliconius	xanthocles		0	0	0	CAM009106		Zamora-Chinchipe, Ecuador	4° 1' 18" S	79° 0' 49" W	WGS	GenePool	HiSeq									ERP009041	ERS977726	ERZ225352	ERX1222436	ERR1143626
